# Supplementary material
Source: publisher site journal article supplement (https://www.spandidos-publications.com/5879/downloadSupplementary)

Figure S1. Successful infection was confirmed through immunofluorescence and western blotting, which screened highest transfection efficiency in decreasing HSP90 $\beta$ . (A and B) HSP90 $\beta$  protein expression was the lowest in lentivirus RNAi(90378) compared with RNAi(90377) and RNAi(90379) groups, n=3 in each group. \*P<0.05 vs. 90377 and 90379 groups. (C) Immunofluorescence showed that the HSP90 $\beta$  lentivirus had successfully infected in rats cortical and subcortical structures. HSP, heat shock protein.

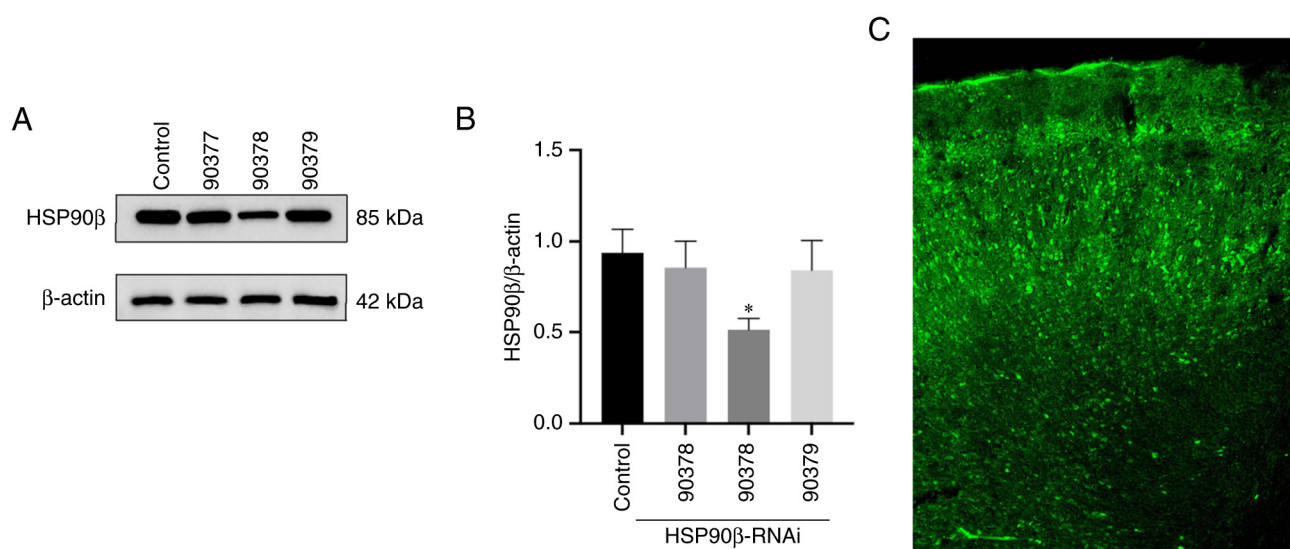

Supplement: Supplementary file 1 [file downloadSupplementary]
